# Supplementary material for: Characterizing glucose, illumination, and nitrogen-deprivation phenotypes ofSynechocystisPCC6803 with Raman spectroscopy
Source: PeerJ journal article supplement (doi:10.7717/peerj.8585), 2020-03-30
Supplement: Supplementary_Appendix_2.pdf [file Supplementary_Appendix_2.pdf]

## Supplementary Appendix 2

### Characterizing metabolic stress-induced phenotypes of *Synechocystis* PCC6803 with Raman spectroscopy

Imen Tanniche<sup>1</sup>, Eva Collakova<sup>2</sup>, Cynthia Denbow<sup>2</sup>, Ryan S. Senger\*<sup>1,3</sup>

<sup>1</sup> Department of Biological Systems Engineering; Virginia Tech; Blacksburg, VA

<sup>2</sup> School of Plant & Environmental Sciences; Virginia Tech; Blacksburg, VA

<sup>3</sup> Department of Chemical Engineering; Virginia Tech; Blacksburg, VA

\* Corresponding Author  
1230 Washington St.  
301C HABB1  
Blacksburg, VA 24061  
Email: [senger@vt.edu](mailto:senger@vt.edu)  
Phone: 540-231-9501

Note: Figures **S1-S4** are contained in Supplementary Appendix 1

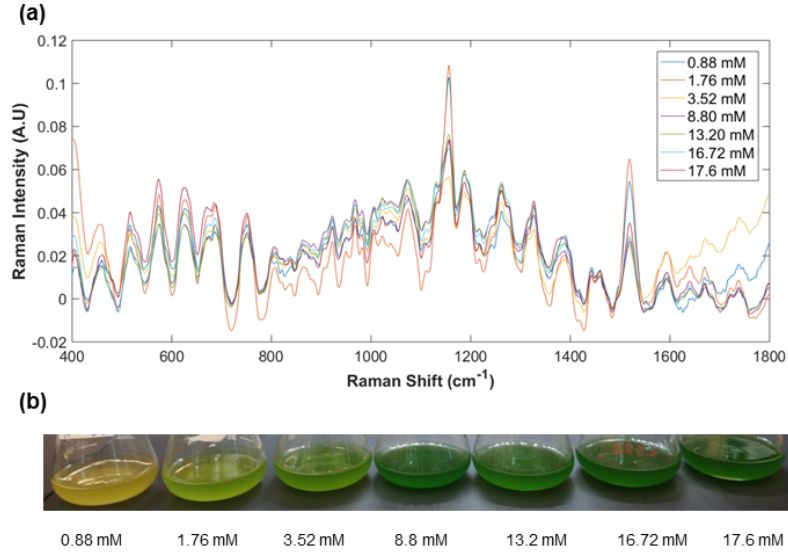

**Figure S5.** *Synechocystis sp.* PCC6803 culture growth under different concentrations of nitrate. (a) Averaged spectra baselined and vector normalized over the range 400-1800 cm<sup>-1</sup>. (b) Visual comparison of bleaching of cells growing under low concentrations of nitrate, where 17.6 mM is nitrate concentration in unaltered BG-11 medium.

Conversion to percentages: 5% = 0.88 mM; 10% = 1.76 mM; 20% = 3.52 mM; 50% = 8.8 mM; 75% = 13.2 mM; 95% = 16.72 mM; 100% = 17.6 mM

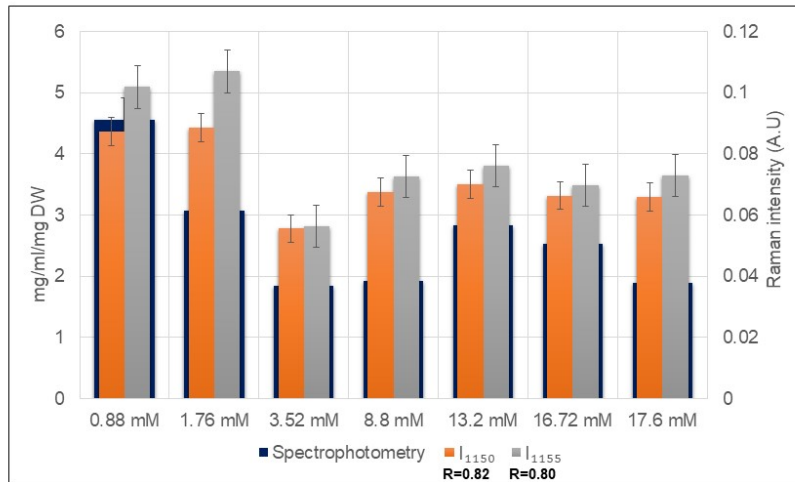

**Figure S6.** Glycogen analysis and Raman spectroscopy in in *Synechocystis sp.* PCC 6803 cells grown under different concentrations of nitrate. Correlation coefficients (R) between Raman bands and glycogen level are represented.

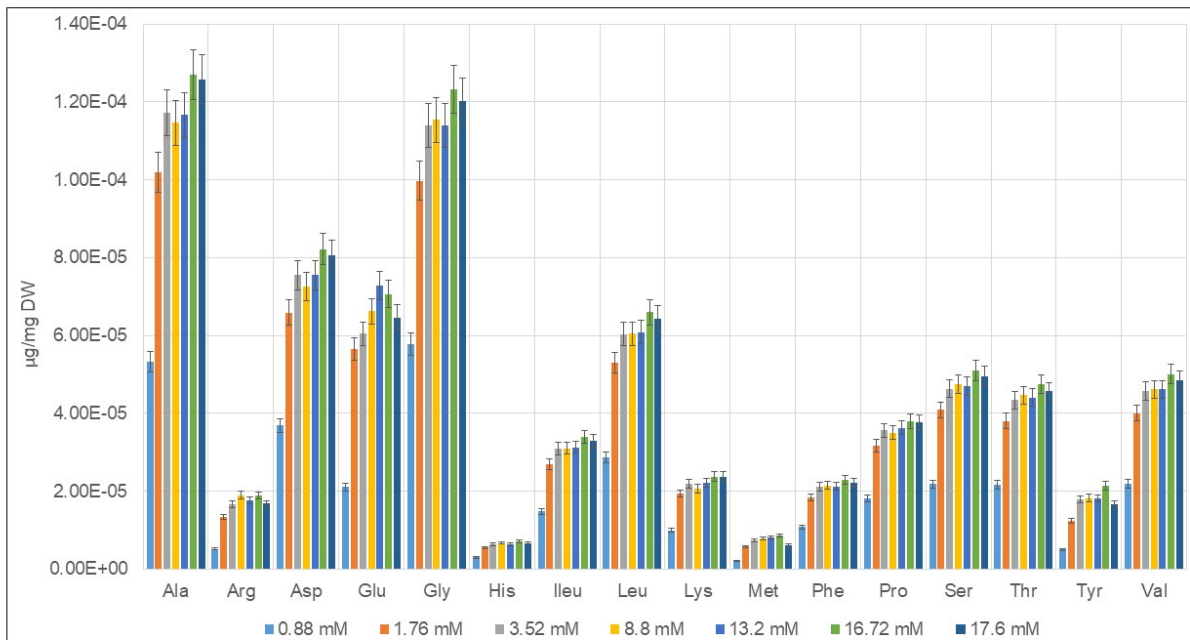

**Figure S7.** Levels of amino acids under nitrogen limitation conditions. Data represent means  $\pm$  standard deviation (SD) of values from three independent experiments. *Synechocystis sp.* PCC6803 cells under 17.6 mM conditions represents the regular concentration of nitrate in BG-11 medium.

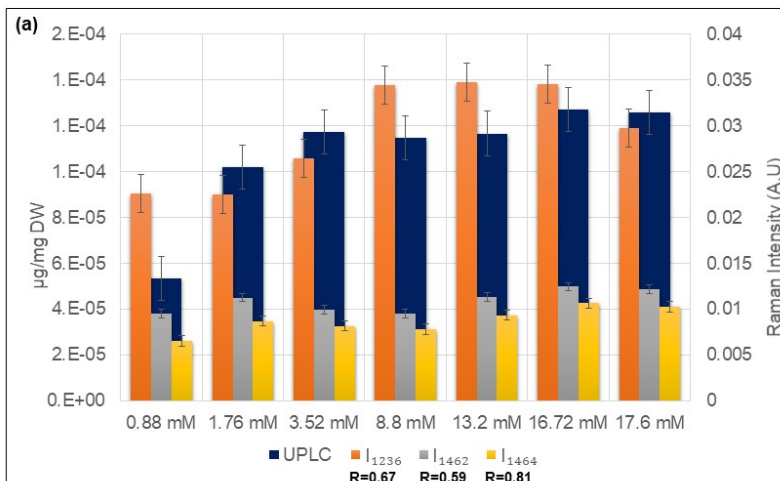

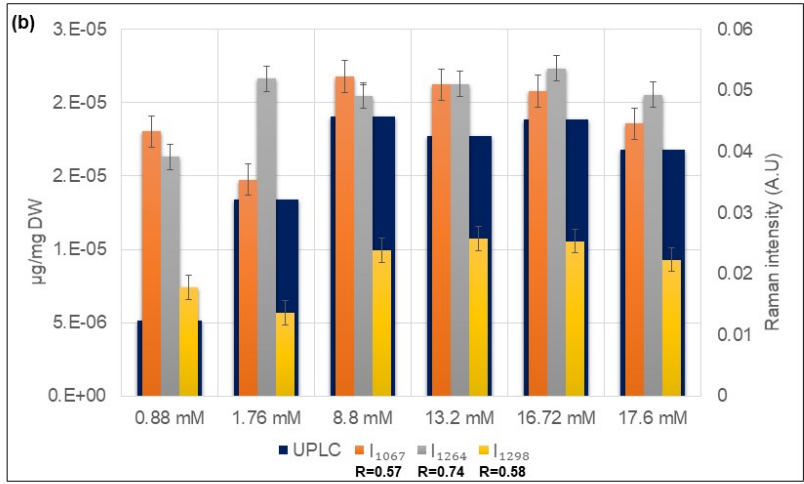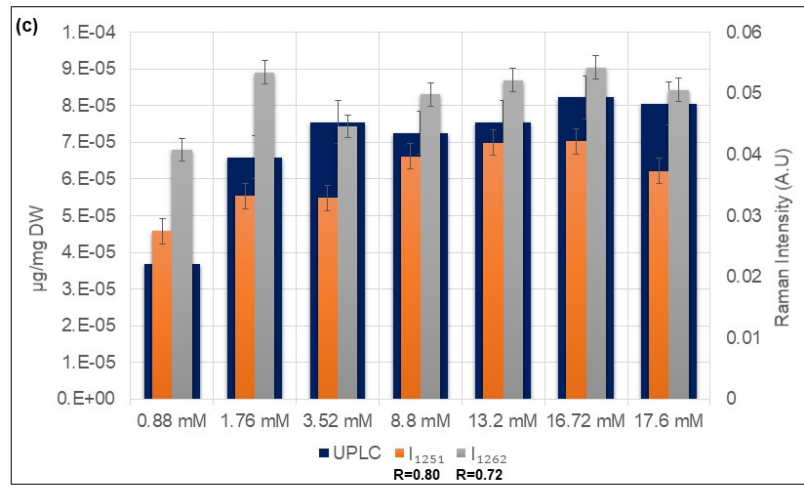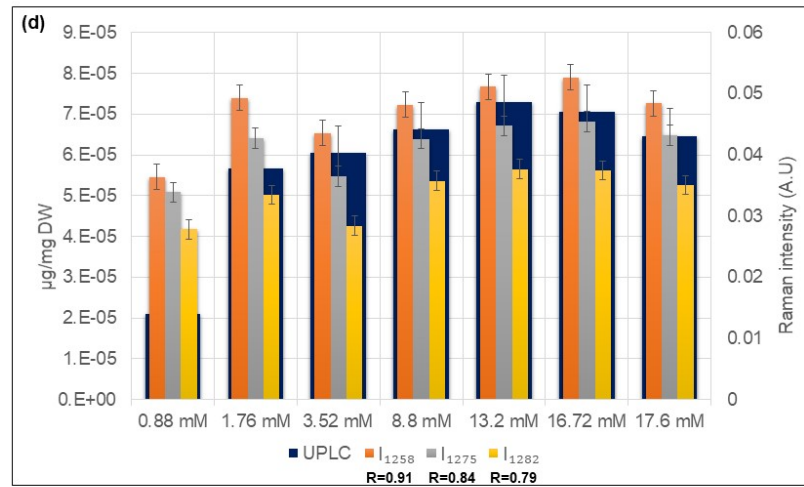

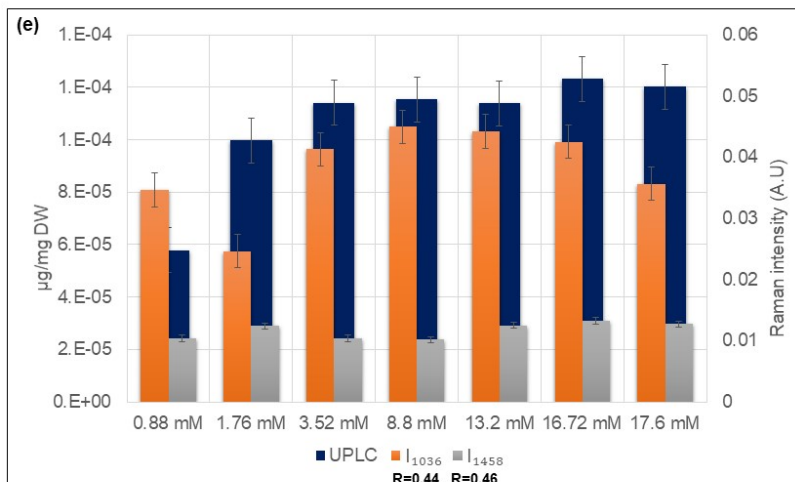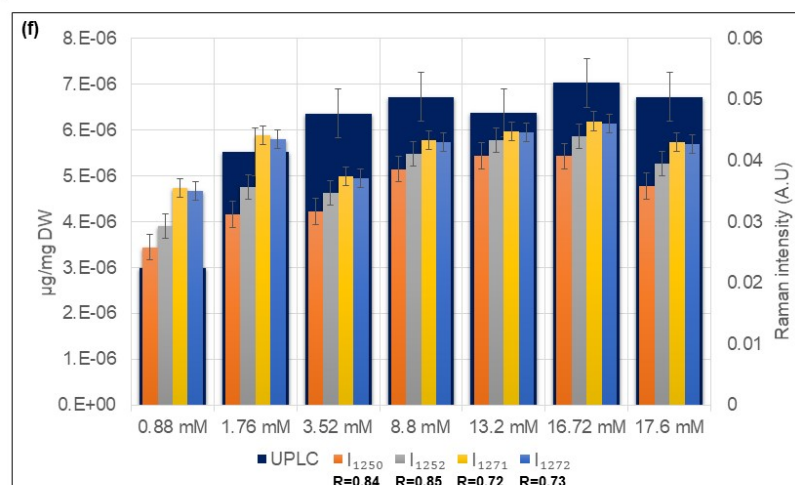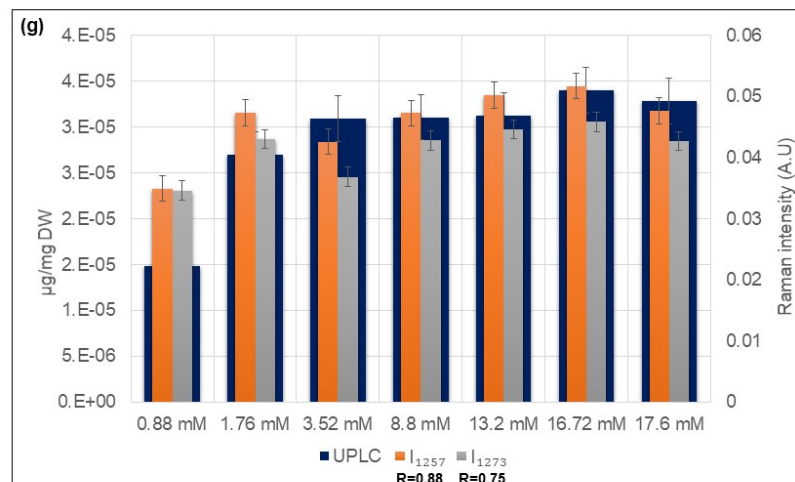

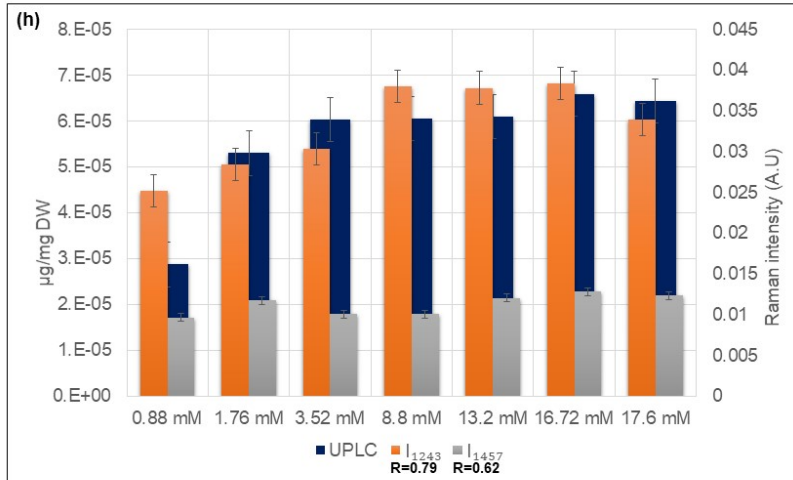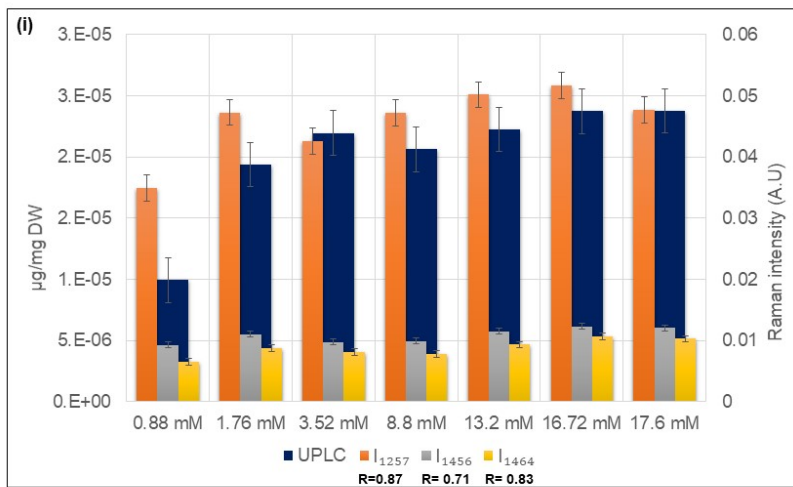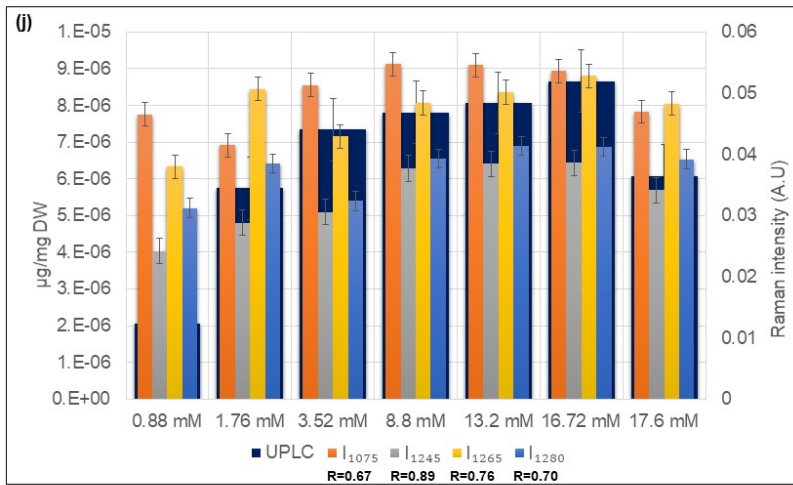

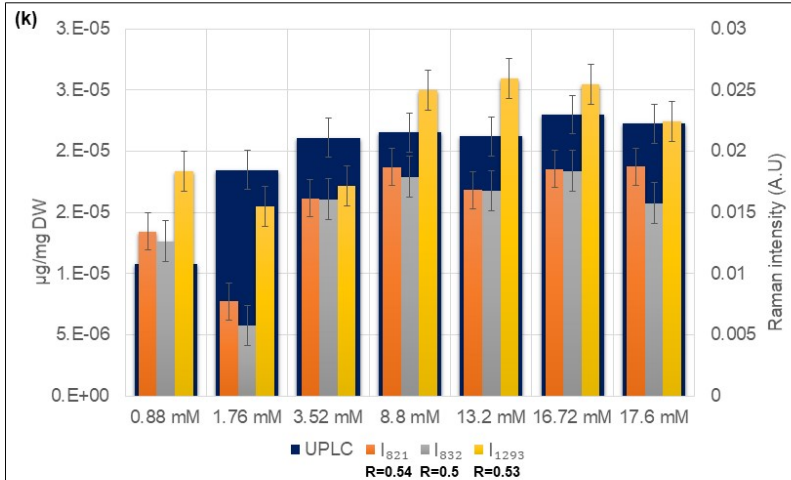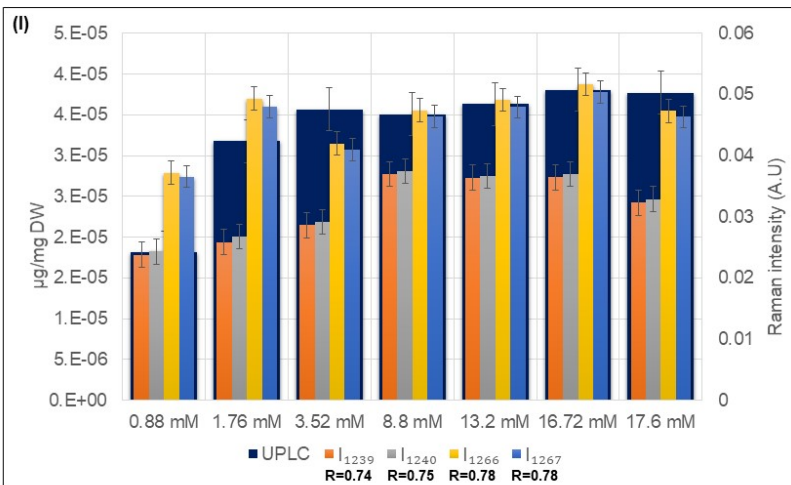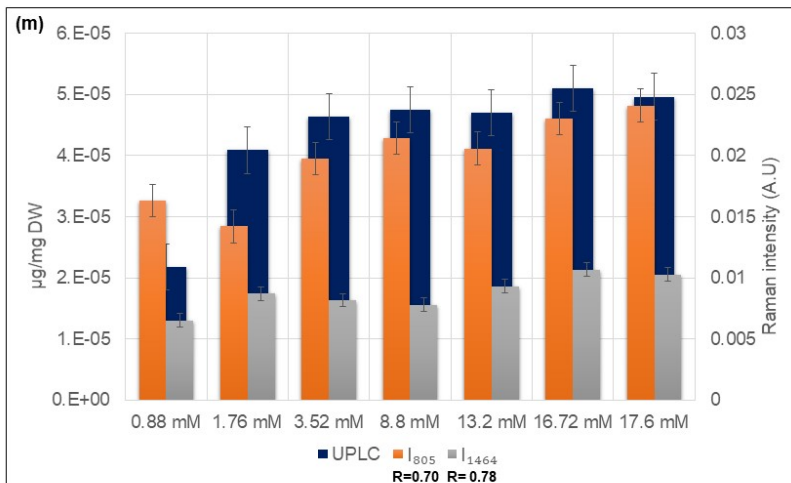

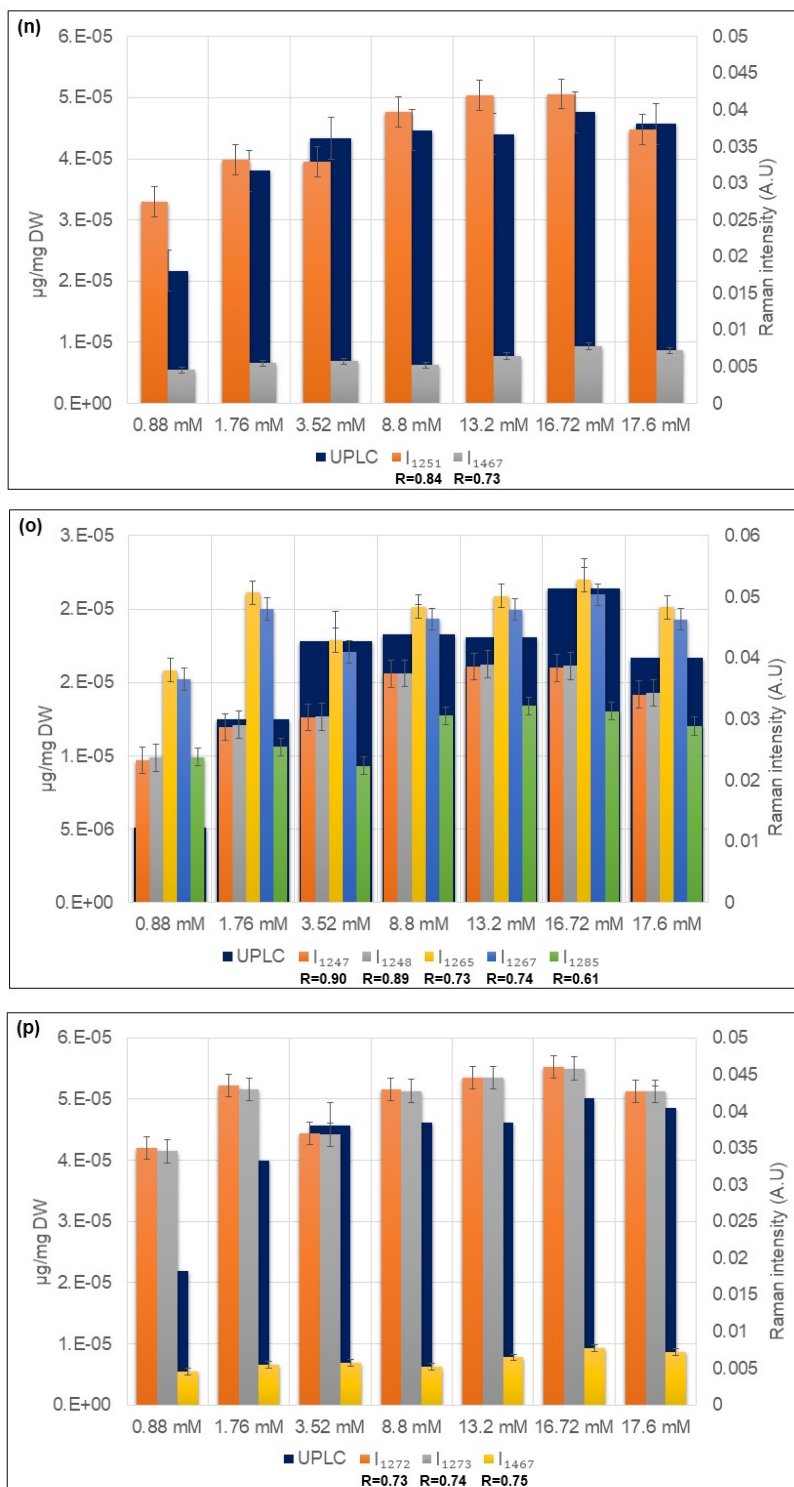

**Figure S8.** Correlation of Raman data with UPLC extraction of amino acids. (a) Alanine, (b) Arginine, (c) Aspartate/Asparagine, (d) Glutamate, (e) Glycine, (f) Histidine, (g) Isoleucine, (h) Leucine, (i) Lysine, (j) Methionine, (k) Phenylalanine, (l) Proline, (m) Serine, (n) Threonine, (o) Tyrosine, (p) Valine. Correlation coefficients (R) for each Raman band are represented.



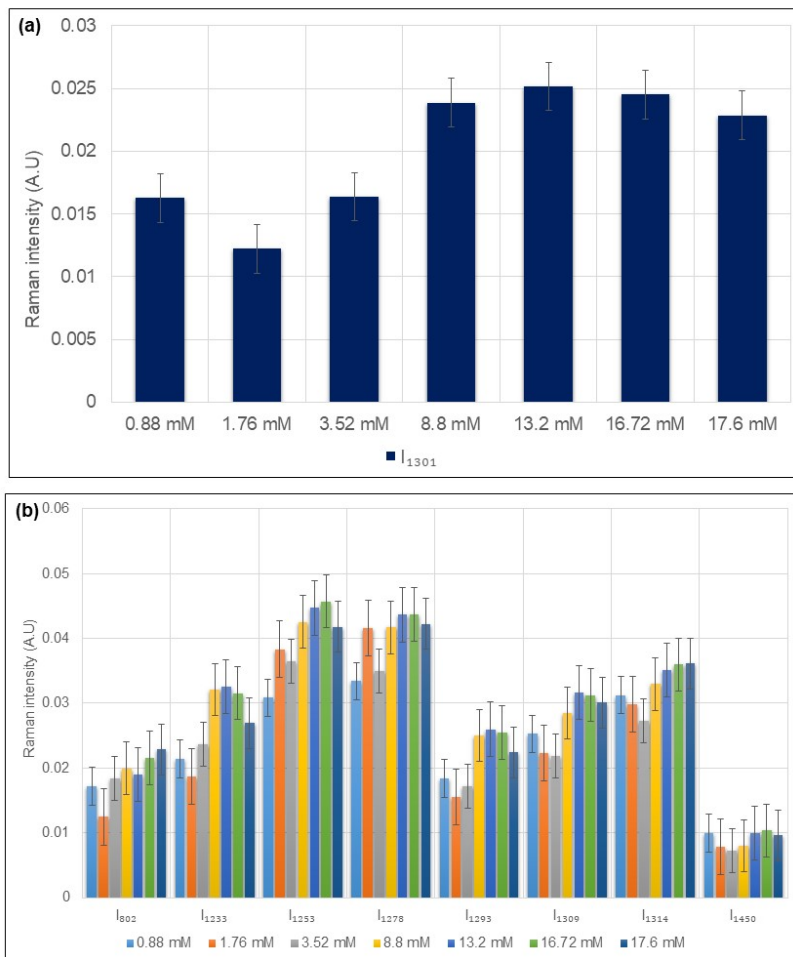

**Figure S9.** Raman bands predictions of amino acids non-resolved with UPLC. (a) Cysteine predictions, (b) Tryptophan predictions.

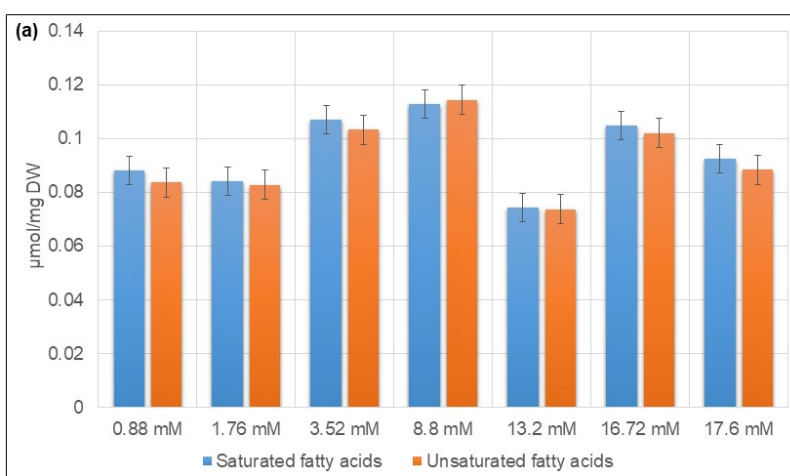

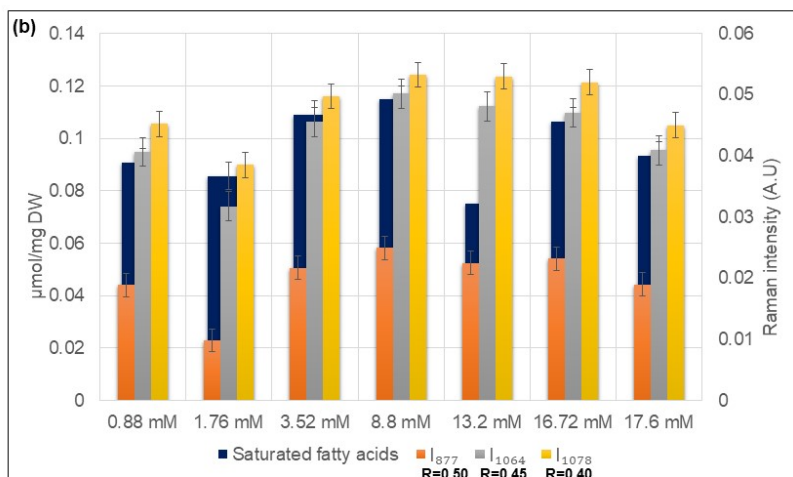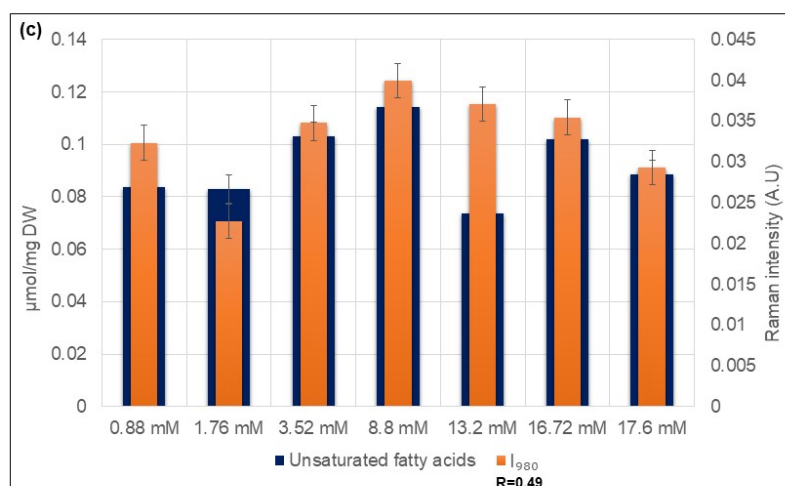

**Figure S10.** Fatty acid levels analysis with GC-FID and Raman spectroscopy in *Synechocystis* sp. PCC 6803 cells grown under different concentrations of nitrate. (a) Total unsaturated fatty acid and total saturated fatty acids levels, (b) Correlation between Raman spectroscopy and GC-FID data of saturated fatty acids, (c) Correlation between Raman spectroscopy and GC-FID data of unsaturated fatty acids analysis. Correlation coefficients (R) for each Raman band are represented.

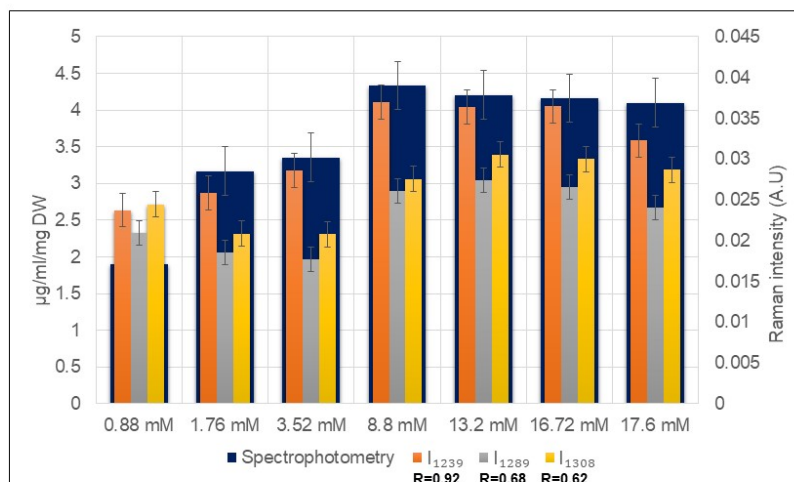

**Figure S11.** Chlorophyll a level and Raman spectroscopy in *Synechocystis sp.* PCC 6803 cells grown under different concentrations of nitrate. Correlation coefficients (R) between Raman bands and chlorophyll a levels are represented.

**Table S1.** All Raman bands cited and tested for amino acids, chlorophyll a, glycogen and fatty acids.

| Biomolecules | Raman bands (cm <sup>-1</sup> ) and Correlation Coefficient (R)    | References |
|--------------|--------------------------------------------------------------------|------------|
| Ala          | 1236 (R = 0.67), 1462 (R = 0.59), 1464 (R = 0.81)                  | (1,2)      |
| Arg          | 1067 (R = 0.57), 1264 (R = 0.74), 1298 (R = 0.58)                  | (1,2)      |
| Asp/Asn      | 1251 (R = 0.80), 1262 (R = 0.72)                                   | (2)        |
| Cys*         | 1301                                                               | (2)        |
| Glu/Gln      | 1258 (R = 0.91), 1275 (R = 0.84), 1282 (R = 0.79)                  | (1)        |
| Gly          | 1036 (R = 0.44), 1458 (R = 0.46)                                   | (2)        |
| His          | 1250 (R = 0.84), 1252 (R = 0.85), 1271 (R = 0.72), 1272 (R = 0.73) | (1,2)      |
| Ile          | 1257 (R = 0.88), 1273 (R = 0.75)                                   | (2)        |
| Leu          | 1243 (R = 0.79), 1457 (R = 0.62)                                   | (2)        |
| Lys          | 1257 (R = 0.87), 1456 (R = 0.71), 1464 (R = 0.83)                  | (2)        |
| Met          | 1075 (R = 0.67), 1245 (R = 0.89), 1265 (R = 0.76), 1280 (R = 0.70) | (2)        |
| Phe          | 821 (R = 0.54), 832 (R = 0.5), 1293 (R = 0.53)                     | (1,2)      |
| Pro          | 1239 (R = 0.74), 1240 (R = 0.75), 1266 (R = 0.78), 1267 (R = 0.78) | (1,2)      |
| Ser          | 805 (R = 0.70), 1464 (R = 0.78)                                    | (2)        |
| Thr          | 1251 (R = 0.84), 1467 (R = 0.73)                                   | (2)        |

|                         |                                                                                     |       |
|-------------------------|-------------------------------------------------------------------------------------|-------|
| Trp*                    | 802, 1233, 1253, 1278, 1293, 1309, 1314, 1450                                       | (1,2) |
| Tyr                     | 1247 (R = 0.90), 1248 (R = 0.89), 1265 (R = 0.73), 1267 (R = 0.74), 1285 (R = 0.61) | (1,2) |
| Val                     | 1272 (R = 0.73), 1273 (R = 0.74), 1467 (R = 0.75)                                   | (1,2) |
| Chlorophyll a           | 1239 (R = 0.92), 1289 (R = 0.68), 1308 (R = 0.62)                                   | (3,4) |
| Glycogen                | 1150 (R = 0.82), 1155 (R = 0.80)                                                    | (5,6) |
| Unsaturated Fatty acids | 980 (R = 0.49)                                                                      | (6)   |
| Saturated Fatty acids   | 877 (0.50), 1064 (0.45), 1078 (0.40)                                                | (6)   |

\* Values for Cys and Trp could not be obtained by the UPLC method used in this research. Only Raman predictions are provided.

\*\* Possible overlapping bands between different biomolecules assigned Raman bands.

## References

1. De Gelder J, De Gussem K, Vandenabeele P, Moens L. Reference database of Raman spectra of biological molecules. *J Raman Spectrosc.* 2007;38(9):1133–47.
2. Zhu G, Zhu X, Fan Q, Wan X. Raman spectra of amino acids and their aqueous solutions. *Spectrochim Acta Mol Biomol Spectrosc.* 2011;78(3):1187–95.
3. Jehlicka J, Edwards HG, Oren A. Raman spectroscopy of microbial pigments. *Appl Env Microbiol.* 2014;80(11):3286–95.
4. Wood BR, Heraud P, Stojkovic S, Morrison D, Beardall J, McNaughton D. A portable Raman acoustic levitation spectroscopic system for the identification and environmental monitoring of algal cells. *Anal Chem.* 2005;77(15):4955–61.
5. Kamemoto LE, Misra AK, Sharma SK, Goodman MT, Luk H, Dykes AC, et al. Near-infrared micro-Raman spectroscopy for in vitro detection of cervical cancer. *Appl Spectrosc.* 2010;64(3):255–61.
6. Movasaghi Z, Rehman S, Rehman IU. Raman Spectroscopy of Biological Tissues. *Appl Spectrosc Rev.* 2007;42(5):493–541.
